# Supplementary material for: Isolation and characterisation of transition and main group metal complexes supported by hydrogen-bonded zwitterionic polyphenolic ligandsElectronic supplementary information (ESI) available: full synthetic and spectroscopic details. See http://www.rsc.org/suppdata/cc/b3/b303618a/
Source: Royal Society of Chemistry journal article supplement (doi:10.1039/b303618a), 2003-01-01
Supplement: b303618a.doc [file b303618a.doc]

Isolation and characterisation of zwitterionic Zr(IV) and Sn(II) complexes supported by poly-phenolic ligands

Matthew G. Davidson**a*, Cheryl L. Doherty,*a* Andrew L. Johnson**a* and Mary F. Mahon*b*

a Department of Chemistry, University of Bath, Claverton Down, Bath. BA2 7AY, U.K. Fax: +44 1225 82 6231; Tel: +44 1225 38 4467; E-mail: [a.l.johnson@bath.ac.uk](mailto:a.l.johnson@bath.ac.uk): [m.g.davidson@bath.ac.uk](mailto:m.g.davidson@bath.ac.uk)

b Bath Chemical Crystallography Unit, Department of Chemistry, University of Bath, Claverton Down, Bath. BA2 7AY, U.K. Fax: +44 1225 82 6231; Tel: 01225 383752; E-mail: [m.f.mahon@bath.ac.uk](mailto:m.f.mahon@bath.ac.uk)

**1 Synthesis and Spectroscopic Characterisation of 3-4**

1.1 General Considerations

All reactions and manipulations were carried out under an atmosphere of dry argon or dinitrogen gas using standard Schlenk and glove box techniques. The ligands, H3L(Me/Me) and H3L(tBu/tBu), were prepared from commercially available starting materials according to literature procedures*[[1]](#footnote-2)*, [Zr(OiPr)4(HOiPr)]2 was purchased from Aldrich and used as received, without further purification. [Sn{N(SiMe3)2}2] was prepared form the reaction of SnCl2 (Aldrich) and 2 equivalents [LiN(SiMe3)2] (Aldrich) using a slightly modified literature procedure.*[[2]](#footnote-3)* For the preparation and characterisation of complexes, all reactions and manipulations were performed under an inert atmosphere of argon or nitrogen using standard Schlenk or glove-box techniques and all solvents were freshly distilled over suitable drying agents and degassed prior to use. 1H 13C and 119Sn NMR spectra were recorded on either a Varian Mercury 400 MHz spectrometer or a Brüker Advance 300 MHz spectrometer, using internal references. Coupling constants are given in hertz. Elemental analysis was performed “in-house” at the Department of Chemistry, University of Bath.

- 1. Synthesis of [{HL(Me/Me)}2Zr], 3a.

[Zr(OiPr)4(HOiPr)] (1.9g, 5mmol) in toluene (5ml) was added dropwise by syringe, to a stirred suspension of H3L(Me/Me) (4.2g, 10mmol) in toluene (30ml) at 0°C. The reaction mixture was allowed to warm to room temperature, with stirring, resulting in a colourless solution. Removal of solvent under reduced pressure resulted in the precipitation of a colourless residue, which was re-dissolved in a minimum of fresh toluene (10ml), with heating. The solution has filtered hot to remove insoluble residues. A colourless crystalline solid was obtained on standing for 3hrs at 0°C. The solid was collected by filtration, washed with cold hexane, and dried in vacuo. Yield: 2.9g, 63%. Anal. Calcd for C54H62N2O6Zr1(C7H8)3: C, 75.0; H, 7.05; N, 2.3: Found: C, 75.2; H, 7.1; N, 2.6; 1H NMR (400 MHz, 23°C), CDCl3 (ppm): 1.96 (s, 18H, L(Me/Me)), 2.19 (s, 18H, L(Me/Me)), 3.31 (m, 6H, CH2 (AB system)), 4.76 (m, 6H, CH2 (BA system)), 6.67 (s, 6H, CH arom), 6.85 (s, 6H, CH arom), 11.81 (br s, 2H, NH+); 13C{1H} NMR (100 MHz)  16.6 (s, L(Me/Me)), 20.5 (s, L(Me/Me)), 56.3 (s, CH2), 116.7 (CH, Aromatic), 124.8 (CH, Aromatic), 127.8 ( C, Aromatic), 129.5 (C, Aromatic), 132.6 (C, Aromatic), 158.9 ( ipso-phenyl O-C, aromatic).

- 1. Synthesis of [L(tBu/tBu)Zr(OiPr)], **3b**

[Zr(OiPr)4(HOiPr)] (1.9g, 5mmol) in toluene (5ml) was added dropwise by syringe, to a stirred suspension of H3L(tBu/tBu) (3.4g, 5mmol) in toluene (20ml) at 0°C. The reaction mixture was allowed to warm to room temperature, with stirring, resulting in a colourless solution. Removal of solvent under reduced pressure resulted in the precipitation of a colourless residue, which was re-dissolved in a minimum of fresh toluene (10ml), with heating. The solution has filtered hot to remove insoluble residues. A colourless crystalline solid was obtained on standing for 24hrs at -15°C. The solid was collected by filtration, washed with cold hexane, and dried in vacuo. Yield: g, 71%. Anal. Calcd for C48H73N1O4Zr1(C6H14): C, 71.6; H, 9.7; N, 1.5: Found: C, 70.9; H, 9.8; N, 1.5; 1H NMR (400 MHz, 23°C), CDCl3 (ppm):  1.19 (s, 27H, L(tBu/tBu)), 1.32 (d, J=6Hz, OCH(Me)2), 1.37 (s, 27H, L(tBu/tBu)), 2.95 (m, 3H, CH2 (AB system), 3.78 (m, 3H, CH2 (BA system), 4.56 (hept, J=6Hz, 1H, OCH(CH3)2), 6.91 (s, 3H, arom.), 7.14 (s, 3H, arom.); 13C{1H} NMR (100 MHz)  27.6 (s, CH(CH3)2), 30.0 (s, L(tBu/tBu)), 32.0 (s, L(tBu/tBu)), 34.6 (s, CMe3 of L(tBu/tBu)), 35.33 (s, CMe3 of L(tBu/tBu)), 60.1 (s, CH2) 72.9 (s, CH(CH3)2), 123.9 (C, Aromatic), 124.3 (CH, Aromatic), 125.2 ( CH, Aromatic), 136.4 (C, Aromatic), 141.6 (C, Aromatic), 157.8 ( ipso-phenyl O-C, aromatic).

- 1. Synthesis of [HL(Me/Me)Sn], **4**

[Sn{N(SiMe3)2}2] (2.2g, 5mmol) in toluene (10ml) was added dropwise by syringe, to a stirred suspension of H3L(Me/Me) (2.1g, 5mmol) in toluene (10ml) at ambient temperature. The reaction mixture was allowed to stir for 3hrs, resulting in a colourless solution. Removal of solvent under reduced pressure resulted in the precipitation of a colourless residue, which was re-dissolved in a minimum of fresh toluene (10ml), with heating. The solution has filtered hot to remove insoluble residues. A colourless crystalline solid was obtained on standing for 12hrs at 5°C. The solid was collected by filtration, washed with cold hexane, and dried in vacuo. Yield: 2.2g, 82%. Anal. Calcd for C27H31N1O3Sn1(C7H8): C, 64.9; H, 6.3; N, 2.2: Found: C, 65.2; H, 6.1; N, 2.6; 1H NMR (400 MHz, 23°C), CD2Cl2 (ppm):  2.09 (s, 9H, L(Me/Me)), 2.17 (s, 9H, L(Me/Me)), 3.84 (s, 6H, CH2), 6.61 (s, 3H, arom.), 6.88 (s, 3H, arom.), 10.68 (s, 1H, NH+) ; 13C{1H} NMR (100 MHz)  19.6 (s, L(Me/Me)), 20.9 (s, L(Me/Me)), 56.3 (s, CH2), 120.8 (C, Aromatic), 126.0 (CH, Aromatic), 127.4 ( CH, Aromatic), 128.0 (C, Aromatic), 133.7 (C, Aromatic), 158.0 ( ipso-phenyl O-C, aromatic) ; 119Sn{1H} NMR (112 MHz) -497.3.

1. **X-ray data for 3-4**

Data for **3**-**4** were collected on a Nonius Kappa CCD diffractometer.

Anisotropic atomic displacement parameters were used throughout for all non-hydrogen atoms. Hydrogen atoms were included at calculated positions and refined using a riding model, with the exception of the nitrogen-bound hydrogen atoms in compounds **3a** and **4**, which were located in difference Fourier electron density maps and refined freely.

In **3a**, the asymmetric unit consisted of one half of a molecule with the central zirconium atom residing on an inversion centre, in addition to one and a half molecules of disordered toluene. Having looked at the disorder and examined it, the best model was found to be one in which both disordered groups are refined with 80% occupancy anisotropically. The half-toluene molecule was located and found to be sitting on a centre of symmetry, the 3 independent carbon atoms and associated hydrogen atoms where again refined anisotropically with 80% occupancy. The methyl group and its associated hydrogens were not located and are believed to be disordered over all 3 unique carbon atom positions.

The asymmetric unit of **3b** consists of a disordered molecule of metal-complex and one molecule of non-disordered hexane. The ligand backbone (i.e. excluding t-butyl groups) exhibits a racemic twinning disorder in which the molecule is disordered over two sites in a 3:1 ratio, and was treated as follows:

In the penultimate refinement cycles all disordered atoms were modelled isotropically, while verifying the relative occupancies of the ligand fractions using free variables. Subsequent refinement of all atoms was anisotropic, using fixed site occupancies as determined above. ADP restraints were applied to two of the phenyl rings in the minor component [C(21A)-C(26A), C(11A)-C(16A)] and also to the carbon of the isopropoxide moiety, where one carbon therein was found to be disordered over two sites in a 1:1 ratio [C(43A), C(43B)].

In complex **4** the asymmetric unit consists of 1/3 of a
complex molecule, with the atoms Sn(1), N(1) and H(1N) residing on a centre of symmetry, their occupancy was therefore modelled with 33.3% anisotroipic displacement parameters. In addition, it was evident that some solvent had
crystallized is the lattice, lying close to the centre of crystallographic symmetry and was modelled using 3 sites for each unique carbon atom refining with an occupancy of 33% in isotropic displacement parameters. One unique orientation was located for the toluene methyl group and its hydrogen atoms, which was also modelled at 33% occupancy.

1. ) M. Kol, M. Shamis, I. Goldbreg, Z. Goldschmidt, S. Alfi and E. Hayut-Salant, *Inorg. Chem. Commun.,* 2001, **4**, 177. [↑](#footnote-ref-2)
2. ) D. H. Harris and M. F. Lappert, *J. Chem Soc., Chem Comm*., 1974, 895. [↑](#footnote-ref-3)
